# Supplementary material
Source: PubMed Central journal article supplement (PMC1945068)
Supplement: pbio.0050218.st001.pdf [file pbio.0050218.st001.pdf]

**Supplementary Table 1**

LC/MS-MS and identification of proteins in CenH3 immune-precipitate

| Experiment                                        | Histone Proteins Identified | Peptides                              | Protein Prophet Score |
|---------------------------------------------------|-----------------------------|---------------------------------------|-----------------------|
| CenH3 cross-linked tetramer Gel slice (Figure 3a) | Histone H2a                 | R.AGLQFPVGR.I                         | 0.998                 |
|                                                   | Histone H2a                 | K.LLSGVTIAQGGVLPNIQAVLLPK             | 0.988                 |
|                                                   | Histone H2b                 | R.KESYAIYIYK.V                        | 0.944                 |
|                                                   | Histone H2b                 | K.AMSIMNSFVNDIFER.I                   | 0.998                 |
|                                                   | Histone H4                  | R.DNIQGITKPAIR.R                      | 0.988                 |
|                                                   | Histone H4                  | R.ISGLIYEETR.G                        | 0.997                 |
| CenH3 eluted from 2M NaCl-washed CenH3 IP beads   | Cid                         | R.APRPSANNSKSPNDDDTAFR.S              | 0.545                 |
|                                                   | Cid                         | R.LQHHPGTLIPK.L                       | 0.793                 |
|                                                   | Cid                         | R.LADSYM'LTK.H                        | 0.502                 |
| *Control H3+2a+2b+H4 Gel slice                    | Histone H2a                 | K.LLSGVTIAQGGVLPNIQAVLLPK.K           | 0.999                 |
|                                                   | Histone H2a                 | R.NDEELNKLLSGVTIAQGGVLPNIQA           | 0.999                 |
|                                                   | Histone H2b                 | VLLPK.K                               | 0.999                 |
|                                                   | Histone H3                  | K.AM'SIM'NSFVNDIFER.I                 | 0.995                 |
|                                                   | Histone H4                  | R.E^IAQDFKTDLR.F                      | 0.999                 |
|                                                   | Histone H4                  | K.RISGLIYEETR.G<br>R.KTVTAMDVVYALKR.Q | 0.999                 |

\*Mass spectrometric analysis of control H3/2a/2b/H4 bulk histone gel slice also identified several non-histone proteins which have not been shown.
