# Supplementary material
Source: PubMed Central journal article supplement (PMC1945068)

**A**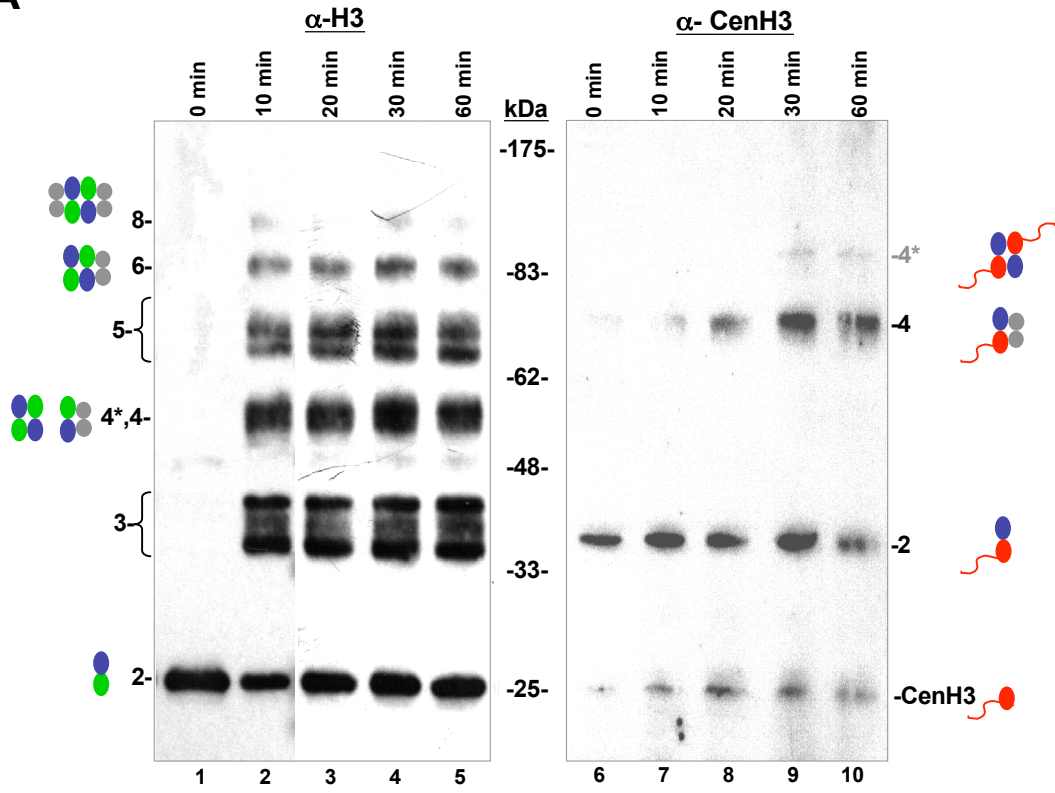**B**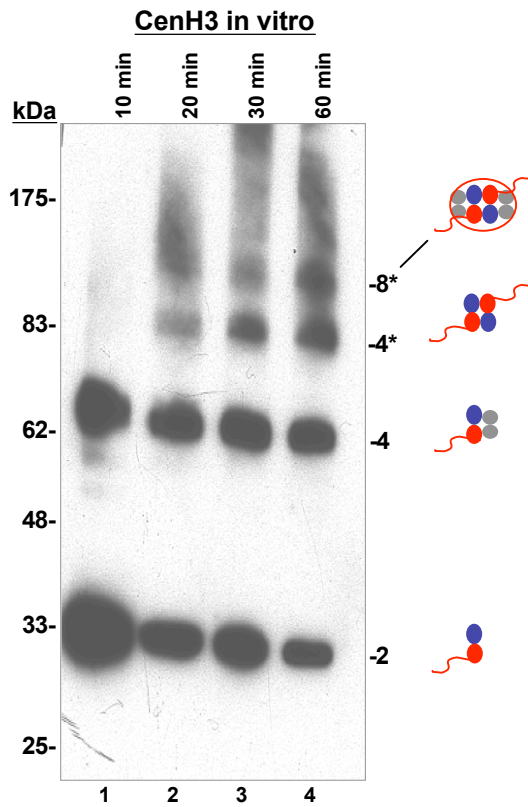**Figure S1**

Supplement: pbio.0050218.sg001.pdf [file pbio.0050218.sg001.pdf]

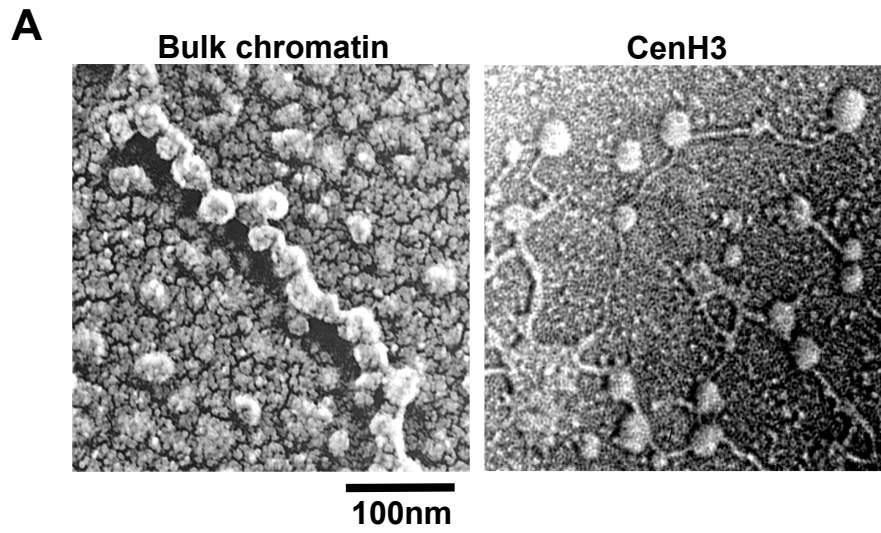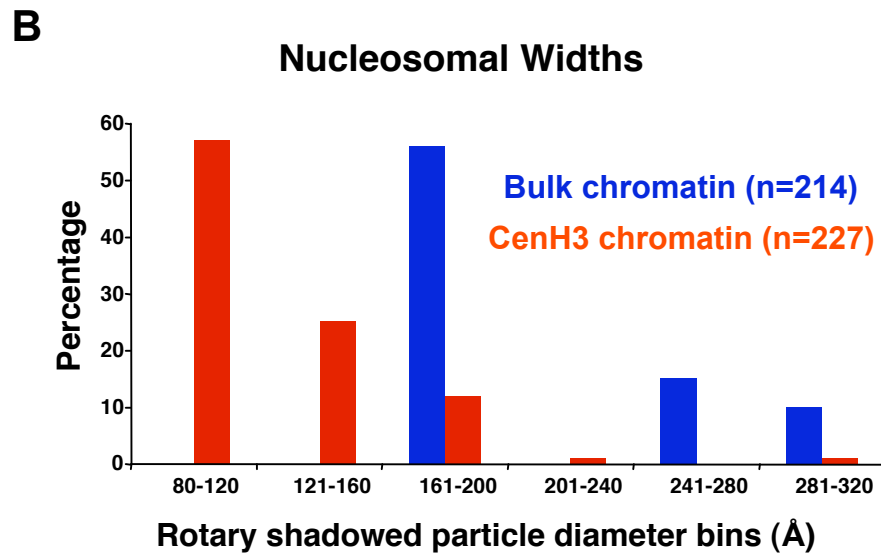

**Figure S2**

Supplement: pbio.0050218.sg002.pdf [file pbio.0050218.sg002.pdf]
